# Supplementary material for: Comparative whole genome re-sequencing analysis in upland New Rice for Africa: insights into the breeding history and respective genome compositions
Source: Rice (N Y). 2018 May 15;11:33. doi: 10.1186/s12284-018-0224-3 (PMC5953909; doi:10.1186/s12284-018-0224-3)
Supplement: Supplementary file 7 — Table S6. Common introgression segments from CG 14. (XLSX 104 kb) [file 12284_2018_224_MOESM7_ESM.xlsx]

## Sheet: TableS6
	Table S6. Common introgression segments from CG 14.
	Chr.	Start posi.	End posi.	Length (bp)
	Chr1	13997213	13997289	77
	Chr1	16329270	16329274	5
	Chr1	23366673	23366794	122
	Chr1	23440025	23440040	16
	Chr1	23499202	23499332	131
	Chr1	23551486	23551487	2
	Chr1	23556723	23556744	22
	Chr1	23578166	23578527	362
	Chr1	23579902	23580160	259
	Chr1	23587336	23587339	4
	Chr1	23587904	23587920	17
	Chr1	23588486	23588507	22
	Chr1	23591159	23591174	16
	Chr1	23591450	23591454	5
	Chr1	23591679	23591688	10
	Chr1	23609076	23609092	17
	Chr1	23609325	23609420	96
	Chr1	23611387	23611422	36
	Chr1	23615726	23615727	2
	Chr1	23615855	23615862	8
	Chr1	23617588	23617720	133
	Chr1	23619498	23619505	8
	Chr1	23620159	23620184	26
	Chr1	23620938	23621015	78
	Chr1	23641055	23641101	47
	Chr1	23642703	23642760	58
	Chr1	23652625	23652633	9
	Chr1	23652938	23653014	77
	Chr1	23653059	23653090	32
	Chr1	23653121	23653154	34
	Chr1	23654671	23654792	122
	Chr1	23654845	23654893	49
	Chr1	23656322	23656333	12
	Chr1	23656533	23657136	604
	Chr1	23657470	23657570	101
	Chr1	23657719	23657767	49
	Chr1	23657881	23657952	72
	Chr1	23673054	23673102	49
	Chr1	23673689	23673754	66
	Chr1	23679720	23680014	295
	Chr1	23680047	23680068	22
	Chr1	23681367	23681450	84
	Chr1	23681470	23681476	7
	Chr1	23681826	23681875	50
	Chr1	23682477	23682486	10
	Chr1	23690967	23691010	44
	Chr1	23692032	23692144	113
	Chr1	23692287	23692358	72
	Chr1	23692400	23692453	54
	Chr1	23692462	23692474	13
	Chr1	23693080	23693124	45
	Chr1	23693181	23693212	32
	Chr1	23693619	23693689	71
	Chr1	23696256	23696262	7
	Chr1	23698381	23698444	64
	Chr1	23703862	23703898	37
	Chr1	23704352	23704389	38
	Chr1	23705240	23705434	195
	Chr1	23706002	23706020	19
	Chr1	23706141	23706186	46
	Chr1	23706672	23706841	170
	Chr1	23707848	23707853	6
	Chr1	23708482	23708643	162
	Chr1	23710072	23710322	251
	Chr1	23711113	23711116	4
	Chr1	23711133	23711172	40
	Chr1	23711521	23711861	341
	Chr1	23711968	23712047	80
	Chr1	23712238	23712241	4
	Chr1	23719017	23719062	46
	Chr1	23719362	23719381	20
	Chr1	23721812	23721838	27
	Chr1	23722690	23722739	50
	Chr1	23722779	23722812	34
	Chr1	23722871	23722923	53
	Chr1	23729274	23730111	838
	Chr1	23731230	23731520	291
	Chr1	23731947	23732204	258
	Chr1	23737176	23737311	136
	Chr1	23750487	23750526	40
	Chr1	23751994	23752007	14
	Chr1	23759783	23759827	45
	Chr1	23760428	23760435	8
	Chr1	23761865	23761919	55
	Chr1	23771643	23771649	7
	Chr1	23777741	23777799	59
	Chr1	23778037	23778283	247
	Chr1	23778301	23778617	317
	Chr1	23778759	23779003	245
	Chr1	23779626	23780389	764
	Chr1	23780498	23780512	15
	Chr1	23780959	23781082	124
	Chr1	23781226	23781287	62
	Chr1	23781376	23781394	19
	Chr1	23781615	23781619	5
	Chr1	23781640	23781696	57
	Chr1	23782145	23782158	14
	Chr1	23783092	23783208	117
	Chr1	23783332	23783363	32
	Chr1	23783409	23783716	308
	Chr1	23784195	23784213	19
	Chr1	23784883	23785225	343
	Chr1	23787702	23787874	173
	Chr1	23787906	23787937	32
	Chr1	23788080	23788135	56
	Chr1	23788193	23788345	153
	Chr1	23788635	23788685	51
	Chr1	23788907	23788953	47
	Chr1	23789048	23789071	24
	Chr1	23789247	23789713	467
	Chr1	23791452	23791468	17
	Chr1	23791563	23791568	6
	Chr1	23798144	23798179	36
	Chr1	23801813	23802016	204
	Chr1	23802330	23802572	243
	Chr1	23802824	23802882	59
	Chr1	23803354	23803394	41
	Chr1	23807973	23807986	14
	Chr1	23808005	23808016	12
	Chr1	23808331	23808347	17
	Chr1	23809495	23809501	7
	Chr1	23815300	23815338	39
	Chr1	27514919	27514935	17
	Chr1	32743093	32743129	37
	Chr1	41037048	41037064	17
	Chr2	12934312	12934352	41
	Chr2	14370573	14370621	49
	Chr2	20474380	20474424	45
	Chr2	20474504	20474533	30
	Chr2	20475251	20475360	110
	Chr2	20480151	20480251	101
	Chr2	20484587	20484608	22
	Chr2	20485238	20485314	77
	Chr2	20485674	20485705	32
	Chr2	20517145	20517155	11
	Chr2	20534038	20534139	102
	Chr2	20537039	20537041	3
	Chr2	20537158	20537329	172
	Chr2	20540146	20540208	63
	Chr2	20542914	20542920	7
	Chr2	20543293	20543420	128
	Chr2	20543779	20543805	27
	Chr2	20545884	20545912	29
	Chr2	20547697	20547712	16
	Chr2	20551871	20551955	85
	Chr2	20552224	20552412	189
	Chr2	20552718	20552943	226
	Chr2	20554546	20554587	42
	Chr2	20556437	20556526	90
	Chr2	20565368	20566087	720
	Chr2	20568078	20568125	48
	Chr2	20568234	20568276	43
	Chr2	20572268	20572339	72
	Chr2	20572603	20572655	53
	Chr2	20572698	20572737	40
	Chr2	20572795	20572823	29
	Chr2	20573636	20573748	113
	Chr2	20574029	20574159	131
	Chr2	20574307	20574315	9
	Chr2	20574545	20574568	24
	Chr2	20598355	20598390	36
	Chr2	20599439	20599460	22
	Chr2	20605603	20605727	125
	Chr2	20607023	20607084	62
	Chr2	20614531	20614541	11
	Chr2	20616921	20616955	35
	Chr2	20629409	20629420	12
	Chr2	20629792	20629847	56
	Chr2	20791237	20791298	62
	Chr2	20791858	20792081	224
	Chr2	20806614	20806625	12
	Chr2	20812122	20812373	252
	Chr2	20817146	20817209	64
	Chr2	20818457	20818510	54
	Chr2	20819152	20819247	96
	Chr2	20821318	20821740	423
	Chr2	20822988	20823032	45
	Chr2	20825105	20825156	52
	Chr2	20825410	20825450	41
	Chr2	20826644	20826726	83
	Chr2	20827013	20827174	162
	Chr2	20827345	20827498	154
	Chr2	20828627	20828713	87
	Chr2	20831320	20831448	129
	Chr2	20832881	20833030	150
	Chr2	20971750	20971931	182
	Chr2	21056587	21056676	90
	Chr2	21082265	21082290	26
	Chr2	21120300	21120408	109
	Chr2	21484138	21484196	59
	Chr2	21904963	21905054	92
	Chr2	21953479	21953480	2
	Chr2	21954254	21954435	182
	Chr2	21954578	21954659	82
	Chr2	22065649	22065784	136
	Chr2	29812118	29812142	25
	Chr2	29830500	29830561	62
	Chr3	6775917	6775926	10
	Chr3	9669414	9669435	22
	Chr3	9801797	9801834	38
	Chr3	9873647	9873941	295
	Chr3	10012767	10012813	47
	Chr3	10189752	10189849	98
	Chr3	11095734	11095734	1
	Chr3	11678718	11679439	722
	Chr3	11711792	11711875	84
	Chr3	11906254	11906502	249
	Chr3	12227178	12227246	69
	Chr3	12450941	12450995	55
	Chr3	12455472	12455622	151
	Chr3	12595699	12595744	46
	Chr3	12656741	12656833	93
	Chr3	12677072	12677147	76
	Chr3	12736442	12736750	309
	Chr3	12825838	12825861	24
	Chr3	12921452	12921466	15
	Chr3	12941420	12941445	26
	Chr3	12969697	12969708	12
	Chr3	13007824	13007943	120
	Chr3	13808295	13808339	45
	Chr3	13810945	13811010	66
	Chr3	13829622	13829670	49
	Chr3	13830271	13831219	949
	Chr3	13838003	13838032	30
	Chr3	13838393	13838422	30
	Chr3	13838449	13838561	113
	Chr3	13840803	13840895	93
	Chr3	13841568	13841625	58
	Chr3	13842861	13842913	53
	Chr3	13843406	13843468	63
	Chr3	13843919	13844106	188
	Chr3	13845604	13845658	55
	Chr3	13845760	13846273	514
	Chr3	13849003	13849141	139
	Chr3	13849635	13850186	552
	Chr3	13851168	13851250	83
	Chr3	13851603	13851687	85
	Chr3	13851719	13851906	188
	Chr3	13852118	13852232	115
	Chr3	13852296	13852333	38
	Chr3	13853741	13853780	40
	Chr3	13853973	13854002	30
	Chr3	13854079	13854687	609
	Chr3	13854795	13854809	15
	Chr3	13855774	13855779	6
	Chr3	13856939	13857003	65
	Chr3	13857326	13857433	108
	Chr3	13857598	13857799	202
	Chr3	13857920	13858021	102
	Chr3	13858221	13858614	394
	Chr3	13858869	13859121	253
	Chr3	13919074	13919160	87
	Chr3	13921203	13921238	36
	Chr3	13925544	13925561	18
	Chr3	13932784	13932833	50
	Chr3	13939467	13939499	33
	Chr3	13970721	13970954	234
	Chr3	13984924	13984936	13
	Chr3	13998509	13998518	10
	Chr3	13999341	13999343	3
	Chr3	13999458	13999512	55
	Chr3	14000661	14000700	40
	Chr3	14009343	14009369	27
	Chr3	14011302	14011427	126
	Chr3	14012782	14012822	41
	Chr3	14014531	14014706	176
	Chr3	14032264	14032280	17
	Chr3	14044676	14044987	312
	Chr3	14048823	14048855	33
	Chr3	14049776	14049777	2
	Chr3	14051858	14051865	8
	Chr3	14058588	14058592	5	LOC_Os03g24770
	Chr3	14059260	14059272	13
	Chr3	14066744	14066818	75
	Chr3	14069108	14069110	3
	Chr3	14069115	14069118	4
	Chr3	14070132	14070134	3
	Chr3	14070164	14070177	14
	Chr3	14076143	14076145	3
	Chr3	14115405	14122377	6973
	Chr3	14145298	14145345	48
	Chr3	14171169	14171258	90
	Chr3	15650647	15650654	8
	Chr4	1598925	1599034	110
	Chr4	1599416	1599542	127
	Chr4	1599809	1599816	8
	Chr4	1600208	1600221	14
	Chr4	1600683	1600847	165
	Chr4	1601393	1601407	15
	Chr4	1601873	1601883	11
	Chr4	1602221	1602223	3
	Chr4	1602963	1602985	23
	Chr4	1603134	1603145	12
	Chr4	16218178	16218200	23
	Chr4	17061226	17061254	29
	Chr4	21555069	21555227	159	LOC_Os04g53860, LOC_Os04g53870, LOC_Os04g53880
	Chr4	26765113	26765245	133
	Chr4	28461587	28461589	3
	Chr4	31414674	31414917	244
	Chr4	31753208	31753762	555
	Chr4	32092335	32092446	112
	Chr4	32092852	32092923	72
	Chr4	32093005	32093026	22
	Chr4	32093060	32105238	12179
	Chr4	32131794	32132220	427
	Chr4	32178449	32178605	157
	Chr4	32246024	32246872	849
	Chr4	32277736	32277830	95
	Chr4	32345555	32346139	585
	Chr5	11032317	11032444	128
	Chr5	23781573	23781581	9
	Chr5	26073040	26073071	32
	Chr5	29006667	29006740	74
	Chr6	4227946	4227974	29
	Chr6	4583870	4583891	22
	Chr6	4620542	4620566	25
	Chr6	4722206	4722213	8
	Chr6	5156414	5156467	54
	Chr6	5185031	5185089	59
	Chr6	5306704	5306707	4
	Chr6	5334044	5334769	726
	Chr6	5381548	5381560	13
	Chr6	5429167	5429173	7
	Chr6	5494273	5494346	74
	Chr6	5613148	5613158	11
	Chr6	5613372	5613474	103
	Chr6	5613486	5613500	15
	Chr6	5613534	5614135	602
	Chr6	5614993	5615049	57
	Chr6	5615942	5616201	260
	Chr6	5616561	5617381	821
	Chr6	5617389	5617399	11
	Chr6	5617495	5617568	74
	Chr6	5617709	5617784	76
	Chr6	5617853	5618384	532
	Chr6	5618561	5618655	95
	Chr6	5618745	5619345	601
	Chr6	5619637	5620206	570
	Chr6	5620419	5620522	104
	Chr6	5620909	5622457	1549
	Chr6	5622890	5623195	306
	Chr6	5623791	5623916	126
	Chr6	5627217	5627289	73
	Chr6	5627432	5628368	937
	Chr6	5628711	5629102	392
	Chr6	5629124	5629135	12
	Chr6	5629177	5629202	26
	Chr6	5629358	5629363	6
	Chr6	5629384	5629397	14
	Chr6	5629407	5629420	14
	Chr6	5629430	5629472	43
	Chr6	5629660	5629822	163
	Chr6	5630087	5630151	65
	Chr6	5630503	5630657	155
	Chr6	5630763	5630780	18
	Chr6	5630793	5630927	135
	Chr6	5633252	5633741	490
	Chr6	5635080	5635428	349
	Chr6	5637621	5637745	125
	Chr6	5638106	5638176	71
	Chr6	5638213	5638495	283
	Chr6	5639168	5640087	920
	Chr6	5641572	5642737	1166
	Chr6	5644033	5644179	147
	Chr6	5644253	5644338	86
	Chr6	5644562	5644737	176
	Chr6	5644755	5644834	80
	Chr6	5646169	5646504	336
	Chr6	5646602	5646743	142
	Chr6	5651792	5651851	60
	Chr6	5652169	5652201	33
	Chr6	5652215	5652227	13
	Chr6	5652278	5652362	85
	Chr6	5652595	5652610	16
	Chr6	5652649	5652724	76
	Chr6	5652738	5652742	5
	Chr6	5652751	5652794	44
	Chr6	5653151	5653268	118
	Chr6	5653429	5653472	44
	Chr6	5653989	5654272	284
	Chr6	5654908	5655011	104
	Chr6	5656330	5656397	68
	Chr6	5656437	5656547	111
	Chr6	5656955	5656981	27
	Chr6	5657603	5657715	113
	Chr6	5657868	5657967	100
	Chr6	5659015	5659023	9
	Chr6	5659940	5660179	240
	Chr6	5662972	5663182	211
	Chr6	5663230	5663350	121
	Chr6	5664672	5664686	15
	Chr6	5665195	5665267	73
	Chr6	5665313	5665339	27
	Chr6	5665359	5665376	18
	Chr6	5666060	5666081	22
	Chr6	5666557	5666578	22
	Chr6	5666716	5666752	37
	Chr6	5666948	5666972	25
	Chr6	5667219	5667253	35
	Chr6	5667370	5667392	23
	Chr6	5667656	5667660	5
	Chr6	5669183	5669234	52
	Chr6	5669288	5669315	28
	Chr6	5671963	5671990	28
	Chr6	5674772	5674804	33
	Chr6	5674809	5674811	3
	Chr6	5674839	5674840	2
	Chr6	5674853	5674858	6
	Chr6	5674892	5674914	23
	Chr6	5675304	5675357	54
	Chr6	5675394	5675442	49
	Chr6	5677436	5677549	114
	Chr6	5677976	5678187	212
	Chr6	5678307	5678374	68
	Chr6	5678728	5678740	13
	Chr6	5679593	5679600	8
	Chr6	5679833	5679843	11
	Chr6	5680160	5680170	11
	Chr6	5681422	5681425	4
	Chr6	5681584	5681660	77
	Chr6	5686493	5686925	433
	Chr6	5689248	5689374	127
	Chr6	5689494	5689768	275
	Chr6	5690717	5690824	108
	Chr6	5691079	5691978	900
	Chr6	5692175	5692493	319
	Chr6	5693254	5693397	144
	Chr6	5693487	5693540	54
	Chr6	5694119	5694161	43
	Chr6	5694525	5694663	139
	Chr6	5694671	5694718	48
	Chr6	5694889	5695341	453
	Chr6	5697357	5697525	169
	Chr6	5697573	5697597	25
	Chr6	5697697	5697853	157
	Chr6	5698533	5698591	59
	Chr6	5699174	5699178	5
	Chr6	5699204	5699224	21
	Chr6	5700053	5700474	422
	Chr6	5701040	5701190	151
	Chr6	5701335	5701408	74
	Chr6	5701576	5701828	253
	Chr6	5703950	5704278	329
	Chr6	5705527	5707055	1529
	Chr6	5707354	5707591	238
	Chr6	5707598	5707605	8
	Chr6	5707646	5707867	222
	Chr6	5707909	5707920	12
	Chr6	5707936	5708226	291
	Chr6	5708817	5709058	242
	Chr6	5709237	5709733	497
	Chr6	5709768	5710105	338
	Chr6	5710169	5710254	86
	Chr6	5710317	5710427	111
	Chr6	5710483	5710490	8
	Chr6	5710511	5710536	26
	Chr6	5710605	5710613	9
	Chr6	5710626	5710627	2
	Chr6	5710662	5710836	175
	Chr6	5710872	5710912	41
	Chr6	5710986	5711003	18
	Chr6	5711668	5714528	2861
	Chr6	5717472	5717472	1
	Chr6	5717647	5717804	158
	Chr6	5721322	5721813	492
	Chr6	5722508	5722571	64
	Chr6	5722962	5722972	11
	Chr6	5722999	5723025	27
	Chr6	5723910	5723941	32
	Chr6	5724970	5725258	289
	Chr6	5728287	5728344	58
	Chr6	5732294	5732312	19
	Chr6	5736938	5736997	60
	Chr6	5737022	5737052	31
	Chr6	5737271	5737323	53
	Chr6	5737361	5737447	87
	Chr6	5737479	5737492	14
	Chr6	5737515	5737527	13
	Chr6	5738588	5738646	59
	Chr6	5740098	5740236	139
	Chr6	5740435	5740450	16
	Chr6	5742176	5742190	15
	Chr6	5742258	5742266	9
	Chr6	5742304	5742329	26
	Chr6	5742996	5743003	8
	Chr6	5743529	5743542	14
	Chr6	5744851	5744864	14
	Chr6	5744901	5744909	9
	Chr6	5745149	5745533	385
	Chr6	5773695	5773711	17
	Chr6	5774164	5774169	6
	Chr6	5774471	5774478	8
	Chr6	5777684	5777691	8
	Chr6	5777829	5777853	25
	Chr6	5783162	5783166	5
	Chr6	5783508	5783547	40
	Chr6	5784361	5784365	5
	Chr6	5785649	5785663	15
	Chr6	5786736	5786749	14
	Chr6	5788117	5788120	4
	Chr6	5788257	5788452	196
	Chr6	5789583	5789670	88
	Chr6	5789681	5789701	21
	Chr6	5789706	5789715	10
	Chr6	5789937	5789979	43
	Chr6	5795169	5795339	171
	Chr6	5795796	5795920	125
	Chr6	5796326	5796351	26
	Chr6	5796362	5796367	6
	Chr6	5800130	5800246	117
	Chr6	5800600	5800650	51
	Chr6	5801022	5801041	20
	Chr6	5801664	5801696	33
	Chr6	5801986	5802191	206
	Chr6	5804094	5804159	66
	Chr6	5804315	5804414	100
	Chr6	5804789	5804812	24
	Chr6	5804883	5804932	50
	Chr6	5807034	5807429	396
	Chr6	5812142	5812154	13
	Chr6	5812288	5812305	18
	Chr6	5812335	5812475	141
	Chr6	5812557	5812584	28
	Chr6	5812599	5812618	20
	Chr6	5812667	5812677	11
	Chr6	5812766	5812855	90
	Chr6	5813003	5813026	24
	Chr6	5814748	5814816	69
	Chr6	5815366	5815523	158
	Chr6	5816827	5816870	44
	Chr6	5816899	5816943	45
	Chr6	5817054	5817086	33
	Chr6	5818024	5818122	99
	Chr6	5818157	5818173	17
	Chr6	5819291	5819443	153
	Chr6	5820196	5820245	50
	Chr6	5820688	5820705	18
	Chr6	5821405	5821571	167
	Chr6	5821797	5821898	102
	Chr6	5821913	5821936	24
	Chr6	5822549	5822718	170
	Chr6	5823175	5823477	303
	Chr6	5823567	5823651	85
	Chr6	5823713	5824601	889
	Chr6	5824773	5824776	4
	Chr6	5824939	5825027	89
	Chr6	5825236	5825271	36
	Chr6	5825320	5825344	25
	Chr6	5825818	5825955	138
	Chr6	5826147	5826199	53
	Chr6	5826554	5826604	51
	Chr6	5826624	5826633	10
	Chr6	5826720	5826730	11
	Chr6	5827361	5830440	3080
	Chr6	5831906	5831969	64
	Chr6	5831988	5832692	705
	Chr6	5832945	5832995	51
	Chr6	5833438	5833462	25
	Chr6	5833678	5833717	40
	Chr6	5835739	5835898	160
	Chr6	5843396	5843541	146
	Chr6	5843711	5844017	307
	Chr6	5844154	5844184	31
	Chr6	5845274	5846114	841
	Chr6	5846231	5846377	147
	Chr6	5847995	5848777	783
	Chr6	5849230	5849694	465
	Chr6	5850460	5850478	19
	Chr6	5854743	5854782	40
	Chr6	5856416	5856566	151
	Chr6	5856987	5857004	18
	Chr6	5857092	5857193	102
	Chr6	5857237	5857272	36
	Chr6	5857347	5857451	105
	Chr6	5857703	5858198	496
	Chr6	5865619	5866002	384
	Chr6	5868241	5868306	66
	Chr6	5870879	5870983	105
	Chr6	5871826	5872430	605
	Chr6	5873107	5873298	192
	Chr6	5873520	5873543	24
	Chr6	5873837	5873871	35
	Chr6	5873957	5874404	448
	Chr6	5874607	5875140	534
	Chr6	5875265	5875606	342
	Chr6	5877634	5877647	14
	Chr6	5879805	5880115	311
	Chr6	5895214	5895257	44
	Chr6	5895784	5895810	27
	Chr6	5896058	5897620	1563
	Chr6	5898549	5900220	1672
	Chr6	5908557	5910651	2095
	Chr6	5912928	5913102	175
	Chr6	5913386	5914258	873
	Chr6	5914940	5914950	11
	Chr6	5915486	5915506	21
	Chr6	5916242	5917116	875
	Chr6	5917466	5917733	268
	Chr6	5917791	5917859	69
	Chr6	5918259	5918515	257
	Chr6	5918537	5918910	374
	Chr6	5920268	5920524	257
	Chr6	5920533	5920543	11
	Chr6	5920677	5920787	111
	Chr6	5921158	5921250	93
	Chr6	5923030	5923239	210
	Chr6	5923428	5923531	104
	Chr6	5923801	5923833	33
	Chr6	5926097	5926207	111
	Chr6	5926405	5926421	17
	Chr6	5926443	5926471	29
	Chr6	5926578	5926832	255
	Chr6	5926934	5927055	122
	Chr6	5927198	5927806	609
	Chr6	5931555	5931560	6
	Chr6	5931568	5931582	15
	Chr6	5931585	5931586	2
	Chr6	5931592	5931608	17
	Chr6	5931623	5931761	139
	Chr6	5933047	5933163	117
	Chr6	5933273	5933535	263
	Chr6	5933840	5934571	732
	Chr6	5935353	5935756	404
	Chr6	5936475	5936568	94
	Chr6	5936897	5937097	201
	Chr6	5937507	5938061	555
	Chr6	5938316	5938445	130
	Chr6	5940334	5940360	27
	Chr6	5940373	5940459	87
	Chr6	5940789	5941110	322
	Chr6	5941537	5941547	11
	Chr6	5941587	5941892	306
	Chr6	5941923	5941955	33
	Chr6	5942034	5942051	18
	Chr6	5942098	5942142	45
	Chr6	5942191	5942462	272
	Chr6	5942528	5942590	63
	Chr6	5943755	5943767	13
	Chr6	5943867	5943872	6
	Chr6	5943885	5945488	1604
	Chr6	5945508	5945531	24
	Chr6	5945547	5945612	66
	Chr6	5945633	5945665	33
	Chr6	5945696	5945961	266
	Chr6	5946030	5946135	106
	Chr6	5946202	5946226	25
	Chr6	5946245	5946247	3
	Chr6	5946255	5946256	2
	Chr6	5946266	5946272	7
	Chr6	5946304	5946306	3
	Chr6	5947137	5947283	147
	Chr6	5947309	5947334	26
	Chr6	5947935	5948134	200
	Chr6	5950638	5950716	79
	Chr6	5950777	5950821	45
	Chr6	5950890	5950968	79
	Chr6	5951172	5951259	88
	Chr6	5951666	5951684	19
	Chr6	5951705	5951752	48
	Chr6	5951819	5951833	15
	Chr6	5952241	5952269	29
	Chr6	5952318	5952340	23
	Chr6	5952374	5952390	17
	Chr6	5952580	5952859	280
	Chr6	5953231	5954246	1016
	Chr6	5954351	5954527	177
	Chr6	5954631	5954780	150
	Chr6	5954922	5955097	176
	Chr6	5955126	5955207	82
	Chr6	5955456	5955552	97
	Chr6	5955797	5955829	33
	Chr6	5955875	5955883	9
	Chr6	5956016	5956059	44
	Chr6	5956104	5956230	127
	Chr6	5956752	5956794	43
	Chr6	5956913	5957244	332
	Chr6	5957269	5957434	166
	Chr6	5964403	5964413	11
	Chr6	5964470	5964494	25
	Chr6	5964497	5964511	15
	Chr6	5964526	5964601	76
	Chr6	5964882	5965082	201
	Chr6	5970532	5970536	5
	Chr6	5970555	5970576	22
	Chr6	5970652	5970684	33
	Chr6	5972073	5972088	16
	Chr6	5972105	5972130	26
	Chr6	5973661	5974017	357
	Chr6	5974123	5974293	171
	Chr6	5974392	5974608	217
	Chr6	5974851	5974871	21
	Chr6	5974935	5975072	138
	Chr6	5975102	5975123	22
	Chr6	5975208	5975251	44
	Chr6	5975351	5975378	28
	Chr6	5976000	5976038	39
	Chr6	5976197	5976216	20
	Chr6	5976258	5976322	65
	Chr6	5976604	5976640	37
	Chr6	5976660	5976699	40
	Chr6	5976969	5977001	33
	Chr6	5977158	5977456	299
	Chr6	5978104	5978723	620
	Chr6	5979378	5979507	130
	Chr6	5981036	5981077	42
	Chr6	5981137	5981244	108
	Chr6	5981488	5981546	59
	Chr6	5981593	5981622	30
	Chr6	5981780	5981844	65
	Chr6	5982331	5983724	1394
	Chr6	5983870	5984208	339
	Chr6	5984923	5985118	196
	Chr6	5985569	5985803	235
	Chr6	5986723	5987729	1007
	Chr6	5988840	5989129	290
	Chr6	5989435	5990040	606
	Chr6	5990305	5990660	356
	Chr6	5990889	5991118	230
	Chr6	5991235	5991450	216
	Chr6	5994572	5994951	380
	Chr6	5996967	5997111	145
	Chr6	5997985	5998083	99
	Chr6	5998144	5998175	32
	Chr6	5998271	5998300	30
	Chr6	5998601	5998788	188
	Chr6	6000689	6000859	171
	Chr6	6001035	6001056	22
	Chr6	6001083	6001103	21
	Chr6	6001933	6002169	237
	Chr6	6002205	6002239	35
	Chr6	6002340	6002407	68
	Chr6	6002518	6002589	72
	Chr6	6003298	6003424	127
	Chr6	6003557	6003644	88
	Chr6	6003742	6003764	23
	Chr6	6004198	6004447	250
	Chr6	6004456	6004471	16
	Chr6	6004531	6004571	41
	Chr6	6006065	6006224	160
	Chr6	6006435	6006771	337
	Chr6	6006796	6007068	273
	Chr6	6007167	6007212	46
	Chr6	6008452	6008613	162
	Chr6	6008680	6008709	30
	Chr6	6009134	6009463	330
	Chr6	6010792	6010814	23
	Chr6	6010845	6011139	295
	Chr6	6011184	6011240	57
	Chr6	6011250	6011328	79
	Chr6	6011387	6011395	9
	Chr6	6012136	6012311	176
	Chr6	6012638	6012640	3
	Chr6	6012744	6012752	9
	Chr6	6012792	6012807	16
	Chr6	6012829	6012911	83
	Chr6	6012924	6012940	17
	Chr6	6013314	6013319	6
	Chr6	6013326	6013395	70
	Chr6	6015335	6015357	23
	Chr6	6015739	6015787	49
	Chr6	6015876	6015930	55
	Chr6	6016021	6016069	49
	Chr6	6017132	6017134	3
	Chr6	6017144	6017207	64
	Chr6	6017318	6017391	74
	Chr6	6017455	6017518	64
	Chr6	6020722	6020976	255
	Chr6	6021400	6021441	42
	Chr6	6021838	6022203	366
	Chr6	6023291	6023500	210
	Chr6	6024277	6024393	117
	Chr6	6025033	6025063	31
	Chr6	6025101	6025120	20
	Chr6	6025176	6025194	19
	Chr6	6025209	6025220	12
	Chr6	6025230	6025331	102
	Chr6	6026890	6027034	145
	Chr6	6027224	6027517	294
	Chr6	6028154	6028788	635
	Chr6	6029151	6029943	793
	Chr6	6029965	6030020	56
	Chr6	6030429	6030509	81
	Chr6	6030604	6030623	20
	Chr6	6030736	6030794	59
	Chr6	6030862	6031045	184
	Chr6	6031053	6031132	80
	Chr6	6031181	6031237	57
	Chr6	6031450	6031458	9
	Chr6	6031468	6031472	5
	Chr6	6031545	6031745	201
	Chr6	6031856	6031923	68
	Chr6	6033050	6033138	89
	Chr6	6033793	6033919	127
	Chr6	6036730	6036883	154
	Chr6	6037080	6037255	176
	Chr6	6037806	6038442	637
	Chr6	6038483	6038679	197
	Chr6	6039529	6039766	238
	Chr6	6040695	6041585	891
	Chr6	6041630	6041774	145
	Chr6	6042628	6042710	83
	Chr6	6043444	6043764	321
	Chr6	6043963	6044096	134
	Chr6	6052475	6052615	141
	Chr6	6052662	6052705	44
	Chr6	6053656	6054170	515
	Chr6	6055255	6055559	305
	Chr6	6056705	6056776	72
	Chr6	6057576	6057645	70
	Chr6	6057887	6057897	11
	Chr6	6058395	6058541	147
	Chr6	6058678	6059146	469
	Chr6	6061043	6061149	107
	Chr6	6061466	6061686	221
	Chr6	6062069	6062139	71
	Chr6	6062141	6062141	1
	Chr6	6062152	6062159	8
	Chr6	6062168	6062174	7
	Chr6	6063269	6063282	14
	Chr6	6063569	6063764	196
	Chr6	6063789	6063803	15
	Chr6	6063850	6064075	226
	Chr6	6064533	6064811	279
	Chr6	6065434	6065546	113
	Chr6	6065753	6066065	313
	Chr6	6066301	6066551	251
	Chr6	6066599	6066659	61
	Chr6	6066984	6067094	111
	Chr6	6067303	6067526	224
	Chr6	6067697	6068398	702
	Chr6	6069741	6069831	91
	Chr6	6069906	6070233	328
	Chr6	6070509	6070563	55
	Chr6	6070674	6070915	242
	Chr6	6071183	6071883	701
	Chr6	6073218	6073870	653
	Chr6	6074834	6074838	5
	Chr6	6075246	6075531	286
	Chr6	6076178	6076268	91
	Chr6	6076317	6076912	596
	Chr6	6076971	6076989	19
	Chr6	6077132	6078015	884
	Chr6	6079350	6079366	17
	Chr6	6079408	6079467	60
	Chr6	6080098	6080598	501
	Chr6	6080671	6080935	265
	Chr6	6081844	6081845	2
	Chr6	6082018	6082239	222
	Chr6	6084405	6084451	47
	Chr6	6084495	6084524	30
	Chr6	6085054	6085065	12
	Chr6	6085572	6085912	341
	Chr6	6086263	6086469	207
	Chr6	6086732	6086862	131
	Chr6	6087182	6087360	179
	Chr6	6087641	6087696	56
	Chr6	6089414	6090943	1530
	Chr6	6092395	6092684	290
	Chr6	6093155	6093249	95
	Chr6	6094207	6094226	20
	Chr6	6096055	6096165	111
	Chr6	6097808	6097949	142
	Chr6	6098037	6098087	51
	Chr6	6098281	6098300	20
	Chr6	6098514	6099828	1315
	Chr6	6099845	6099871	27
	Chr6	6099886	6099934	49
	Chr6	6100097	6100110	14
	Chr6	6100163	6100271	109
	Chr6	6101237	6103340	2104
	Chr6	6103601	6103683	83
	Chr6	6104120	6104383	264
	Chr6	6107172	6109124	1953
	Chr6	6110207	6110419	213
	Chr6	6110844	6111097	254
	Chr6	6111110	6111126	17
	Chr6	6111268	6111274	7
	Chr6	6111775	6111821	47
	Chr6	6112046	6112380	335
	Chr6	6112455	6112552	98
	Chr6	6113971	6113974	4
	Chr6	6114011	6114013	3
	Chr6	6114028	6114043	16
	Chr6	6114312	6114328	17
	Chr6	6114908	6114978	71
	Chr6	6115040	6115045	6
	Chr6	6115074	6115153	80
	Chr6	6115499	6116235	737
	Chr6	6116247	6116264	18
	Chr6	6116300	6116310	11
	Chr6	6117299	6117766	468
	Chr6	6118056	6118181	126
	Chr6	6118367	6118457	91
	Chr6	6118528	6118562	35
	Chr6	6118599	6118676	78
	Chr6	6118725	6118729	5
	Chr6	6120004	6120020	17
	Chr6	6121028	6121254	227
	Chr6	6121291	6121382	92
	Chr6	6121553	6121561	9
	Chr6	6121655	6121729	75
	Chr6	6121781	6121816	36
	Chr6	6121962	6122151	190
	Chr6	6122296	6122880	585
	Chr6	6123026	6123111	86
	Chr6	6125331	6128023	2693
	Chr6	6128157	6128632	476
	Chr6	6128688	6129439	752
	Chr6	6129521	6129737	217
	Chr6	6130704	6130738	35
	Chr6	6130855	6130857	3
	Chr6	6140955	6140959	5
	Chr6	6141490	6142175	686
	Chr6	6142470	6142485	16
	Chr6	6142569	6142569	1
	Chr6	6142616	6142690	75
	Chr6	6143276	6143281	6
	Chr6	6143286	6143307	22
	Chr6	6143335	6143355	21
	Chr6	6143544	6143692	149
	Chr6	6144461	6144476	16
	Chr6	6144536	6144540	5
	Chr6	6144629	6144752	124
	Chr6	6144997	6144998	2
	Chr6	6145120	6145177	58
	Chr6	6145253	6145258	6
	Chr6	6145579	6145589	11
	Chr6	6145797	6146002	206
	Chr6	6146062	6146069	8
	Chr6	6149039	6149326	288
	Chr6	6150918	6150958	41
	Chr6	6151358	6151551	194
	Chr6	6153742	6153764	23
	Chr6	6153791	6153816	26
	Chr6	6155349	6155386	38
	Chr6	6155410	6155523	114
	Chr6	6155541	6155583	43
	Chr6	6156045	6156568	524
	Chr6	6159223	6159787	565
	Chr6	6159869	6159915	47
	Chr6	6160054	6160250	197
	Chr6	6160971	6161118	148
	Chr6	6161970	6162123	154
	Chr6	6163127	6163381	255
	Chr6	6163882	6163883	2
	Chr6	6163894	6163931	38
	Chr6	6164114	6164134	21
	Chr6	6164160	6164229	70
	Chr6	6164357	6164359	3
	Chr6	6166820	6166892	73
	Chr6	6167258	6167448	191
	Chr6	6167652	6167724	73
	Chr6	6168572	6168617	46
	Chr6	6170044	6170254	211
	Chr6	6170684	6170731	48
	Chr6	6170882	6170900	19
	Chr6	6171136	6171702	567
	Chr6	6173398	6174155	758
	Chr6	6174329	6174430	102
	Chr6	6174634	6175446	813
	Chr6	6175684	6175907	224
	Chr6	6177389	6177409	21
	Chr6	6177821	6178315	495
	Chr6	6180013	6180411	399
	Chr6	6181921	6181965	45
	Chr6	6182257	6182580	324
	Chr6	6183190	6183200	11
	Chr6	6183210	6183227	18
	Chr6	6183246	6183309	64
	Chr6	6183480	6183486	7
	Chr6	6183554	6183635	82
	Chr6	6183878	6183908	31
	Chr6	6184011	6184023	13
	Chr6	6184040	6184202	163
	Chr6	6184509	6184585	77
	Chr6	6184938	6184978	41
	Chr6	6185158	6185162	5
	Chr6	6186050	6186054	5
	Chr6	6186368	6186581	214
	Chr6	6188860	6188884	25
	Chr6	6188902	6188909	8
	Chr6	6188940	6189011	72
	Chr6	6189036	6189133	98
	Chr6	6189170	6189315	146
	Chr6	6189327	6189380	54
	Chr6	6189382	6189388	7
	Chr6	6189398	6189513	116
	Chr6	6189535	6189630	96
	Chr6	6189636	6189811	176
	Chr6	6189822	6189871	50
	Chr6	6189884	6189931	48
	Chr6	6189978	6190052	75
	Chr6	6190065	6190234	170
	Chr6	6190257	6190270	14
	Chr6	6190290	6190369	80
	Chr6	6190478	6190528	51
	Chr6	6190652	6191337	686
	Chr6	6191584	6191604	21
	Chr6	6191682	6192092	411
	Chr6	6193490	6193528	39
	Chr6	6193534	6193557	24
	Chr6	6193572	6193595	24
	Chr6	6193623	6193745	123
	Chr6	6193791	6193919	129
	Chr6	6193921	6193936	16
	Chr6	6193946	6194029	84
	Chr6	6195143	6195403	261
	Chr6	6195416	6195416	1
	Chr6	6195423	6195938	516
	Chr6	6195943	6196270	328
	Chr6	6196290	6196480	191
	Chr6	6196487	6196717	231
	Chr6	6196721	6196728	8
	Chr6	6196783	6196801	19
	Chr6	6196809	6197144	336
	Chr6	6197155	6197210	56
	Chr6	6197224	6197360	137
	Chr6	6197374	6200233	2860
	Chr6	6202427	6202818	392
	Chr6	6202829	6202847	19
	Chr6	6202855	6202865	11
	Chr6	6202869	6202916	48
	Chr6	6202929	6202938	10
	Chr6	6202965	6204958	1994
	Chr6	6205542	6207326	1785
	Chr6	6207612	6207730	119
	Chr6	6212356	6212368	13
	Chr6	6212411	6212553	143
	Chr6	6213307	6213701	395
	Chr6	6214362	6214562	201
	Chr6	6214581	6214602	22
	Chr6	6214970	6215014	45
	Chr6	6215081	6215117	37
	Chr6	6215179	6215219	41
	Chr6	6215284	6215293	10
	Chr6	6215341	6215504	164
	Chr6	6215823	6215845	23
	Chr6	6215863	6215904	42
	Chr6	6215931	6215946	16
	Chr6	6216138	6216210	73
	Chr6	6216236	6216278	43
	Chr6	6218483	6219354	872
	Chr6	6220898	6221877	980
	Chr6	6223425	6224053	629
	Chr6	6224205	6224330	126
	Chr6	6224529	6224846	318
	Chr6	6225841	6226025	185
	Chr6	6226429	6226522	94
	Chr6	6226572	6226597	26
	Chr6	6226614	6226625	12
	Chr6	6226650	6226666	17
	Chr6	6226812	6226858	47
	Chr6	6227211	6227248	38
	Chr6	6228618	6228876	259
	Chr6	6229165	6229179	15
	Chr6	6229215	6229227	13
	Chr6	6229477	6229692	216
	Chr6	6231621	6231641	21
	Chr6	6231750	6231755	6
	Chr6	6231800	6231819	20
	Chr6	6231990	6232029	40
	Chr6	6232133	6232149	17
	Chr6	6233172	6233284	113
	Chr6	6233453	6233648	196
	Chr6	6233982	6234093	112
	Chr6	6234201	6234221	21
	Chr6	6234378	6234587	210
	Chr6	6234670	6234850	181
	Chr6	6234979	6235040	62
	Chr6	6235073	6235136	64
	Chr6	6235153	6235295	143
	Chr6	6235344	6235396	53
	Chr6	6235592	6235635	44
	Chr6	6235647	6235756	110
	Chr6	6235781	6235871	91
	Chr6	6237361	6237377	17
	Chr6	6237391	6237407	17
	Chr6	6237452	6237689	238
	Chr6	6240062	6240121	60
	Chr6	6240418	6240513	96
	Chr6	6240749	6240874	126
	Chr6	6241115	6241498	384
	Chr6	6242862	6243138	277
	Chr6	6243286	6243411	126
	Chr6	6243791	6244028	238
	Chr6	6244254	6245399	1146
	Chr6	6247680	6247849	170
	Chr6	6247859	6247930	72
	Chr6	6247947	6247970	24
	Chr6	6248014	6248041	28
	Chr6	6248050	6248090	41
	Chr6	6248110	6248143	34
	Chr6	6248229	6248234	6
	Chr6	6249223	6249366	144
	Chr6	6249423	6249646	224
	Chr6	6249905	6249991	87
	Chr6	6252534	6252548	15
	Chr6	6254577	6254670	94
	Chr6	6254779	6254940	162
	Chr6	6255047	6255065	19
	Chr6	6256713	6256761	49
	Chr6	6256786	6256825	40
	Chr6	6256830	6256842	13
	Chr6	6256859	6256898	40
	Chr6	6256977	6257017	41
	Chr6	6257044	6257200	157
	Chr6	6257202	6257236	35
	Chr6	6257260	6257317	58
	Chr6	6257359	6257393	35
	Chr6	6257595	6257613	19
	Chr6	6257633	6257695	63
	Chr6	6257774	6257921	148
	Chr6	6258009	6258056	48
	Chr6	6263128	6263279	152
	Chr6	6263549	6263627	79
	Chr6	6263818	6263822	5
	Chr6	6263884	6263918	35
	Chr6	6264103	6264137	35
	Chr6	6264352	6264489	138
	Chr6	6264668	6264701	34
	Chr6	6264718	6264766	49
	Chr6	6264903	6264907	5
	Chr6	6264918	6264931	14
	Chr6	6264954	6265003	50
	Chr6	6265047	6265106	60
	Chr6	6265126	6265186	61
	Chr6	6265203	6265250	48
	Chr6	6265359	6265897	539
	Chr6	6265968	6266065	98
	Chr6	6266688	6267006	319
	Chr6	6267131	6267396	266
	Chr6	6267565	6267636	72
	Chr6	6268153	6268215	63
	Chr6	6274804	6274872	69
	Chr6	6280663	6280827	165
	Chr6	6280996	6281230	235
	Chr6	6282147	6282148	2
	Chr6	6283054	6283060	7
	Chr6	6283161	6283163	3
	Chr6	6283169	6283172	4
	Chr6	6283307	6283314	8
	Chr6	6283963	6284035	73
	Chr6	6284667	6284840	174
	Chr6	6286144	6286287	144
	Chr6	6286387	6286400	14
	Chr6	6286440	6286468	29
	Chr6	6286660	6286664	5
	Chr6	6286729	6286779	51
	Chr6	6287125	6287201	77
	Chr6	6287307	6287337	31
	Chr6	6287393	6287472	80
	Chr6	6287524	6287555	32
	Chr6	6287614	6287675	62
	Chr6	6287734	6287775	42
	Chr6	6288149	6288372	224
	Chr6	6291503	6291504	2
	Chr6	6291538	6291546	9
	Chr6	6291554	6291592	39
	Chr6	6291775	6291961	187
	Chr6	6292247	6292263	17
	Chr6	6292810	6293303	494
	Chr6	6293473	6293542	70
	Chr6	6293572	6293615	44
	Chr6	6293824	6293881	58
	Chr6	6294217	6294322	106
	Chr6	6294445	6294465	21
	Chr6	6294638	6294645	8
	Chr6	6294765	6294896	132
	Chr6	6295287	6295308	22
	Chr6	6297843	6298341	499
	Chr6	6298410	6298503	94
	Chr6	6298622	6298655	34
	Chr6	6299146	6299182	37
	Chr6	6299303	6299313	11
	Chr6	6299334	6299355	22
	Chr6	6299445	6299486	42
	Chr6	6299514	6299531	18
	Chr6	6299560	6299576	17
	Chr6	6300946	6301435	490
	Chr6	6301791	6301813	23
	Chr6	6301873	6301925	53
	Chr6	6303291	6303297	7
	Chr6	6303391	6303626	236
	Chr6	6307020	6307150	131
	Chr6	6307534	6307592	59
	Chr6	6307663	6307713	51
	Chr6	6308153	6308160	8
	Chr6	6308180	6308219	40
	Chr6	6308283	6308290	8
	Chr6	6308324	6308374	51
	Chr6	6308639	6308650	12
	Chr6	6308661	6308722	62
	Chr6	6310915	6310921	7
	Chr6	6311360	6311366	7
	Chr6	6313944	6314073	130
	Chr6	6314911	6314920	10
	Chr6	6329770	6329775	6
	Chr6	6329977	6329983	7
	Chr6	6332803	6332829	27
	Chr6	6332916	6332986	71
	Chr6	6333258	6333263	6
	Chr6	6333429	6333430	2
	Chr6	6333615	6333639	25
	Chr6	6333761	6333817	57
	Chr6	6333999	6334038	40
	Chr6	6334065	6334116	52
	Chr6	6334145	6334162	18
	Chr6	6334295	6334346	52
	Chr6	6334418	6334424	7
	Chr6	6334782	6334862	81
	Chr6	6336987	6338079	1093
	Chr6	6338631	6339142	512
	Chr6	6339163	6339224	62
	Chr6	6339289	6339306	18
	Chr6	6339368	6339376	9
	Chr6	6339465	6339482	18
	Chr6	6339524	6339532	9
	Chr6	6339622	6339632	11
	Chr6	6339797	6339807	11
	Chr6	6339812	6339815	4
	Chr6	6340178	6340292	115
	Chr6	6342005	6342036	32
	Chr6	6342055	6342056	2
	Chr6	6342286	6342313	28
	Chr6	6342340	6342374	35
	Chr6	6342690	6342692	3
	Chr6	6344314	6344377	64
	Chr6	6344435	6344477	43
	Chr6	6344664	6344799	136
	Chr6	6346857	6346998	142
	Chr6	6351504	6351628	125
	Chr6	6351966	6353088	1123
	Chr6	6356113	6356124	12
	Chr6	6356134	6356172	39
	Chr6	6359502	6359540	39
	Chr6	6359594	6359697	104
	Chr6	6359718	6359737	20
	Chr6	6368250	6368251	2
	Chr6	6368266	6368287	22
	Chr6	6368309	6368361	53
	Chr6	6368735	6368747	13
	Chr6	6368766	6368875	110
	Chr6	6370100	6370232	133
	Chr6	6370579	6370798	220
	Chr6	6371256	6371326	71
	Chr6	6371431	6371482	52
	Chr6	6371588	6371736	149
	Chr6	6371942	6371965	24
	Chr6	6371988	6372047	60
	Chr6	6372362	6372582	221
	Chr6	6373155	6373303	149
	Chr6	6373385	6373996	612
	Chr6	6375690	6375702	13
	Chr6	6375710	6375725	16
	Chr6	6375762	6375803	42
	Chr6	6375940	6376070	131
	Chr6	6377305	6377328	24
	Chr6	6382010	6382032	23
	Chr6	6382159	6382163	5
	Chr6	6382834	6382842	9
	Chr6	6385498	6385500	3
	Chr6	6385533	6385547	15
	Chr6	6387804	6387818	15
	Chr6	6388199	6388326	128
	Chr6	6388398	6388757	360
	Chr6	6389178	6389179	2
	Chr6	6389205	6389224	20
	Chr6	6389270	6389306	37
	Chr6	6389575	6389617	43
	Chr6	6390055	6390268	214
	Chr6	6396036	6396278	243
	Chr6	6396375	6396377	3
	Chr6	6396405	6396406	2
	Chr6	6396429	6396655	227
	Chr6	6400821	6400843	23
	Chr6	6401668	6401687	20
	Chr6	6401863	6402156	294
	Chr6	6402369	6402378	10
	Chr6	6402614	6402730	117
	Chr6	6404240	6404467	228
	Chr6	6405317	6405768	452
	Chr6	6407972	6409160	1189
	Chr6	6411815	6412047	233
	Chr6	6413812	6413993	182
	Chr6	6414031	6414050	20
	Chr6	6414203	6414555	353
	Chr6	6415975	6416110	136
	Chr6	6417399	6417455	57
	Chr6	6417541	6417546	6
	Chr6	6417584	6417620	37
	Chr6	6417689	6417732	44
	Chr6	6420878	6420900	23
	Chr6	6421620	6421628	9
	Chr6	6421696	6421874	179
	Chr6	6421980	6421986	7
	Chr6	6421994	6422014	21
	Chr6	6422055	6422099	45
	Chr6	6422281	6422377	97
	Chr6	6422395	6422404	10
	Chr6	6422544	6422641	98
	Chr6	6422849	6422883	35
	Chr6	6423936	6423963	28
	Chr6	6424051	6424154	104
	Chr6	6424341	6424385	45
	Chr6	6424420	6424928	509
	Chr6	6425211	6425358	148
	Chr6	6425832	6425862	31
	Chr6	6431560	6431583	24
	Chr6	6432157	6432266	110
	Chr6	6432578	6432588	11
	Chr6	6433226	6433382	157
	Chr6	6434100	6434252	153
	Chr6	6434752	6434756	5
	Chr6	6436504	6436568	65
	Chr6	6437035	6437278	244
	Chr6	6438903	6439137	235
	Chr6	6439848	6440036	189
	Chr6	6441778	6441966	189
	Chr6	6444631	6444672	42
	Chr6	6447974	6448021	48
	Chr6	6448349	6448394	46
	Chr6	6449461	6449651	191
	Chr6	6449758	6449854	97
	Chr6	6450059	6450556	498
	Chr6	6450574	6450593	20
	Chr6	6451317	6451602	286
	Chr6	6451764	6451795	32
	Chr6	6455273	6455312	40
	Chr6	6455412	6455432	21
	Chr6	6455501	6455509	9
	Chr6	6455515	6455642	128
	Chr6	6455801	6456072	272
	Chr6	6456993	6457286	294
	Chr6	6457588	6459048	1461
	Chr6	6459260	6459431	172
	Chr6	6461459	6462026	568
	Chr6	6463967	6464088	122
	Chr6	6464123	6464164	42
	Chr6	6464232	6464348	117
	Chr6	6464456	6464548	93
	Chr6	6464823	6465300	478
	Chr6	6465990	6466016	27
	Chr6	6466272	6466867	596
	Chr6	6471429	6471456	28
	Chr6	6472678	6472832	155
	Chr6	6479129	6479203	75
	Chr6	6482445	6482471	27
	Chr6	6482481	6482499	19
	Chr6	6482523	6482747	225
	Chr6	6482893	6483018	126
	Chr6	6483139	6483236	98
	Chr6	6483438	6484234	797
	Chr6	6484817	6485233	417
	Chr6	6485976	6486423	448
	Chr6	6489109	6489234	126
	Chr6	6491341	6491350	10
	Chr6	6491375	6491491	117
	Chr6	6491793	6491820	28
	Chr6	6492508	6492531	24
	Chr6	6492846	6492853	8
	Chr6	6492880	6492905	26
	Chr6	6493146	6493177	32
	Chr6	6493234	6493235	2
	Chr6	6493245	6493260	16
	Chr6	6493437	6493442	6
	Chr6	6493895	6493897	3
	Chr6	6493962	6493971	10
	Chr6	6494031	6494031	1
	Chr6	6494045	6494054	10
	Chr6	6494216	6494245	30
	Chr6	6496819	6496923	105
	Chr6	6500213	6500249	37
	Chr6	6504271	6504707	437
	Chr6	6506260	6506539	280
	Chr6	6506778	6506895	118
	Chr6	6507337	6507413	77
	Chr6	6507640	6507981	342
	Chr6	6508023	6509589	1567
	Chr6	6509889	6510754	866
	Chr6	6511003	6511939	937
	Chr6	6512326	6512840	515
	Chr6	6513345	6514126	782
	Chr6	6514322	6514648	327
	Chr6	6514669	6514682	14
	Chr6	6514980	6514990	11
	Chr6	6515005	6515088	84
	Chr6	6519631	6519675	45
	Chr6	6519694	6519872	179
	Chr6	6519992	6520056	65
	Chr6	6520215	6520444	230
	Chr6	6520472	6520507	36
	Chr6	6520562	6520643	82
	Chr6	6520718	6521027	310
	Chr6	6521299	6521388	90
	Chr6	6521509	6521656	148
	Chr6	6522127	6522145	19
	Chr6	6522186	6522497	312
	Chr6	6522664	6522677	14
	Chr6	6522706	6522779	74
	Chr6	6522821	6522824	4
	Chr6	6524050	6524089	40
	Chr6	6524215	6524246	32
	Chr6	6528019	6528305	287
	Chr6	6528639	6528712	74
	Chr6	6528757	6528789	33
	Chr6	6529158	6529248	91
	Chr6	6531256	6531336	81
	Chr6	6532494	6533177	684
	Chr6	6536061	6536281	221
	Chr6	6536488	6536532	45
	Chr6	6536562	6536760	199
	Chr6	6536980	6537368	389
	Chr6	6537394	6537546	153
	Chr6	6537555	6537670	116
	Chr6	6537778	6537812	35
	Chr6	6537921	6538038	118
	Chr6	6538233	6538248	16
	Chr6	6538365	6538467	103
	Chr6	6538474	6538725	252
	Chr6	6538878	6539166	289
	Chr6	6539199	6539259	61
	Chr6	6539294	6539351	58
	Chr6	6539361	6539431	71
	Chr6	6539645	6539872	228
	Chr6	6539883	6539905	23
	Chr6	6540461	6540464	4
	Chr6	6540505	6540549	45
	Chr6	6540647	6540723	77
	Chr6	6540974	6541026	53
	Chr6	6541143	6541502	360
	Chr6	6541577	6544203	2627
	Chr6	6544246	6546957	2712
	Chr6	6548053	6548155	103
	Chr6	6548765	6549460	696
	Chr6	6549703	6549942	240
	Chr6	6552087	6552093	7
	Chr6	6552112	6552133	22
	Chr6	6552156	6552172	17
	Chr6	6552964	6553045	82
	Chr6	6553218	6553233	16
	Chr6	6553240	6553253	14
	Chr6	6553261	6553345	85
	Chr6	6553458	6553499	42
	Chr6	6553548	6553632	85
	Chr6	6556608	6556666	59
	Chr6	6556782	6556904	123
	Chr6	6557528	6557646	119
	Chr6	6558276	6558331	56
	Chr6	6558406	6558406	1
	Chr6	6558496	6558536	41
	Chr6	6558729	6558942	214
	Chr6	6559321	6559469	149
	Chr6	6559738	6559758	21
	Chr6	6559820	6559851	32
	Chr6	6560336	6561094	759
	Chr6	6563413	6563419	7
	Chr6	6563476	6563561	86
	Chr6	6565001	6565048	48
	Chr6	6567903	6567906	4
	Chr6	6568205	6568226	22
	Chr6	6568338	6568480	143
	Chr6	6568791	6568818	28
	Chr6	6568959	6569038	80
	Chr6	6569087	6569122	36
	Chr6	6573779	6573799	21
	Chr6	6574236	6574726	491
	Chr6	6577942	6578237	296
	Chr6	6578574	6578636	63
	Chr6	6578828	6578918	91
	Chr6	6578936	6578980	45
	Chr6	6579059	6579237	179
	Chr6	6579376	6579600	225
	Chr6	6579838	6579848	11
	Chr6	6579897	6579921	25
	Chr6	6581068	6581099	32
	Chr6	6581397	6581442	46
	Chr6	6582328	6582385	58
	Chr6	6582990	6583223	234
	Chr6	6583933	6584005	73
	Chr6	6584054	6584106	53
	Chr6	6584617	6584725	109
	Chr6	6585625	6585633	9
	Chr6	6589236	6589677	442
	Chr6	6589703	6590461	759
	Chr6	6593822	6593836	15
	Chr6	6593882	6593918	37
	Chr6	6594105	6594274	170
	Chr6	6595303	6595344	42
	Chr6	6595411	6595445	35
	Chr6	6596179	6596354	176
	Chr6	6596559	6597075	517
	Chr6	6597181	6597643	463
	Chr6	6598678	6598794	117
	Chr6	6599025	6599035	11
	Chr6	6599145	6599256	112
	Chr6	6599562	6599705	144
	Chr6	6600219	6600703	485
	Chr6	6601476	6601556	81
	Chr6	6601645	6602103	459
	Chr6	6602452	6602459	8
	Chr6	6602847	6602909	63
	Chr6	6602950	6603084	135
	Chr6	6603159	6603669	511
	Chr6	6606309	6606506	198
	Chr6	6607141	6607481	341
	Chr6	6609219	6609231	13
	Chr6	6609289	6609357	69
	Chr6	6609729	6609839	111
	Chr6	6610088	6610101	14
	Chr6	6610586	6610712	127
	Chr6	6612168	6612177	10
	Chr6	6612317	6612593	277
	Chr6	6617690	6617695	6
	Chr6	6617919	6618110	192
	Chr6	6618265	6618309	45
	Chr6	6618352	6618429	78
	Chr6	6619413	6619699	287
	Chr6	6620598	6620603	6
	Chr6	6620855	6620871	17
	Chr6	6620914	6621025	112
	Chr6	6621288	6621446	159
	Chr6	6622122	6622168	47
	Chr6	6623601	6623780	180
	Chr6	6624200	6624246	47
	Chr6	6624819	6624935	117
	Chr6	6625806	6625818	13
	Chr6	6625880	6626030	151
	Chr6	6626163	6626189	27
	Chr6	6626514	6626566	53
	Chr6	6626578	6626682	105
	Chr6	6626762	6626878	117
	Chr6	6631129	6631164	36
	Chr6	6631282	6631298	17
	Chr6	6631426	6631455	30
	Chr6	6632924	6632969	46
	Chr6	6633191	6633281	91
	Chr6	6633564	6633827	264
	Chr6	6634130	6634171	42
	Chr6	6634310	6634417	108
	Chr6	6634616	6634677	62
	Chr6	6634844	6634849	6
	Chr6	6634881	6634890	10
	Chr6	6635183	6635216	34
	Chr6	6635268	6635367	100
	Chr6	6635490	6635557	68
	Chr6	6635580	6635591	12
	Chr6	6635631	6635690	60
	Chr6	6636438	6636495	58
	Chr6	6636697	6636778	82
	Chr6	6637381	6637381	1
	Chr6	6643102	6643123	22
	Chr6	6643263	6643347	85
	Chr6	6643359	6643365	7
	Chr6	6643617	6643637	21
	Chr6	6648336	6648565	230
	Chr6	6650582	6651092	511
	Chr6	6652398	6652610	213
	Chr6	6652818	6653463	646
	Chr6	6653653	6653656	4
	Chr6	6653666	6653693	28
	Chr6	6653757	6653842	86
	Chr6	6654274	6654342	69
	Chr6	6654392	6654529	138
	Chr6	6655504	6655572	69
	Chr6	6655699	6655782	84
	Chr6	6655976	6655998	23
	Chr6	6656954	6657242	289
	Chr6	6659630	6659780	151
	Chr6	6660423	6660858	436
	Chr6	6661207	6661269	63
	Chr6	6661511	6661559	49
	Chr6	6661955	6661961	7
	Chr6	6662369	6662731	363
	Chr6	6663245	6663291	47
	Chr6	6663760	6663977	218
	Chr6	6664355	6664818	464
	Chr6	6666774	6666997	224
	Chr6	6667101	6667247	147
	Chr6	6667718	6667741	24
	Chr6	6667947	6667973	27
	Chr6	6668365	6668429	65
	Chr6	6671709	6671766	58
	Chr6	6671808	6671839	32
	Chr6	6672113	6672117	5
	Chr6	6672133	6672169	37
	Chr6	6672567	6672572	6
	Chr6	6672644	6672759	116
	Chr6	6672765	6672781	17
	Chr6	6672904	6672973	70
	Chr6	6673040	6673094	55
	Chr6	6673609	6673800	192
	Chr6	6677736	6677881	146
	Chr6	6678517	6678529	13
	Chr6	6679365	6679366	2
	Chr6	6680723	6680760	38
	Chr6	6681442	6681479	38
	Chr6	6682427	6682457	31
	Chr6	6683346	6683427	82
	Chr6	6683712	6683734	23
	Chr6	6684207	6684462	256
	Chr6	6685478	6685671	194
	Chr6	6686396	6686486	91
	Chr6	6686824	6686898	75
	Chr6	6687624	6687744	121
	Chr6	6691109	6691125	17
	Chr6	6691494	6692049	556
	Chr6	6694736	6694818	83
	Chr6	6695356	6695372	17
	Chr6	6695428	6695463	36
	Chr6	6696273	6696345	73
	Chr6	6696935	6697130	196
	Chr6	6697397	6698363	967
	Chr6	6699344	6700698	1355
	Chr6	6701110	6701541	432
	Chr6	6705227	6705293	67
	Chr6	6705416	6705418	3
	Chr6	6711135	6711144	10
	Chr6	6711189	6711225	37
	Chr6	6711518	6711553	36
	Chr6	6711578	6711588	11
	Chr6	6711596	6711652	57
	Chr6	6711968	6712128	161
	Chr6	6712183	6712342	160
	Chr6	6712362	6712400	39
	Chr6	6712734	6712834	101
	Chr6	6713058	6713085	28
	Chr6	6713188	6713194	7
	Chr6	6715467	6715605	139
	Chr6	6716300	6716634	335
	Chr6	6717528	6717669	142
	Chr6	6718699	6718846	148
	Chr6	6720405	6720636	232
	Chr6	6721136	6721331	196
	Chr6	6721725	6721900	176
	Chr6	6722526	6722543	18
	Chr6	6722565	6722603	39
	Chr6	6722667	6722862	196
	Chr6	6723193	6723377	185
	Chr6	6723506	6723516	11
	Chr6	6723560	6723753	194
	Chr6	6724006	6724124	119
	Chr6	6724624	6724647	24
	Chr6	6725823	6725877	55
	Chr6	6726134	6726602	469
	Chr6	6726912	6727281	370
	Chr6	6729561	6729843	283
	Chr6	6732292	6732546	255
	Chr6	6732696	6732832	137
	Chr6	6733407	6733577	171
	Chr6	6735430	6735852	423
	Chr6	6736054	6736084	31
	Chr6	6737563	6738049	487
	Chr6	6738085	6738202	118
	Chr6	6738269	6738329	61
	Chr6	6738381	6738707	327
	Chr6	6738756	6738816	61
	Chr6	6738850	6738911	62
	Chr6	6740307	6740439	133
	Chr6	6741160	6741174	15
	Chr6	6741335	6741338	4
	Chr6	6741367	6741560	194
	Chr6	6742137	6742391	255
	Chr6	6744100	6744177	78
	Chr6	6745200	6745573	374
	Chr6	6745671	6745722	52
	Chr6	6745780	6745905	126
	Chr6	6747048	6747126	79
	Chr6	6747374	6747429	56
	Chr6	6747675	6747701	27
	Chr6	6747727	6747743	17
	Chr6	6747748	6747757	10
	Chr6	6747769	6747779	11
	Chr6	6747810	6747828	19
	Chr6	6747859	6748744	886
	Chr6	6748891	6748950	60
	Chr6	6749244	6749416	173
	Chr6	6749477	6749678	202
	Chr6	6750022	6750423	402
	Chr6	6750521	6750733	213
	Chr6	6753035	6753432	398
	Chr6	6754008	6754584	577
	Chr6	6754595	6754661	67
	Chr6	6754806	6754948	143
	Chr6	6755140	6755213	74
	Chr6	6755256	6755331	76
	Chr6	6755360	6755434	75
	Chr6	6755491	6755735	245
	Chr6	6755893	6756018	126
	Chr6	6756020	6756023	4
	Chr6	6759589	6759747	159
	Chr6	6761000	6761064	65
	Chr6	6762027	6762420	394
	Chr6	6764537	6765108	572
	Chr6	6765654	6765672	19
	Chr6	6765687	6765706	20
	Chr6	6766138	6766323	186
	Chr6	6769209	6769473	265
	Chr6	6770458	6770586	129
	Chr6	6770740	6770912	173
	Chr6	6770917	6771193	277
	Chr6	6782682	6782687	6
	Chr6	6782771	6783324	554
	Chr6	6784378	6784414	37
	Chr6	6784839	6784907	69
	Chr6	6785317	6785598	282
	Chr6	6785766	6785871	106
	Chr6	6786825	6787227	403
	Chr6	6787818	6787818	1
	Chr6	6787877	6787955	79
	Chr6	6789019	6789411	393
	Chr6	6790372	6790502	131
	Chr6	6790508	6790979	472
	Chr6	6791239	6791306	68
	Chr6	6791621	6791763	143
	Chr6	6792139	6792146	8
	Chr6	6793420	6793496	77
	Chr6	6793997	6794210	214
	Chr6	6796006	6796240	235
	Chr6	6798217	6798296	80
	Chr6	6798497	6798688	192
	Chr6	6798693	6798750	58
	Chr6	6798883	6798901	19
	Chr6	6798938	6798972	35
	Chr6	6799036	6799118	83
	Chr6	6799269	6799454	186
	Chr6	6799640	6799665	26
	Chr6	6799801	6800019	219
	Chr6	6802356	6802504	149
	Chr6	6807381	6807437	57
	Chr6	6810383	6810429	47
	Chr6	6811121	6811148	28
	Chr6	6811268	6811386	119
	Chr6	6811703	6812147	445
	Chr6	6812279	6812349	71
	Chr6	6812418	6812438	21
	Chr6	6812475	6812534	60
	Chr6	6814381	6814394	14
	Chr6	6814466	6814908	443
	Chr6	6814998	6815168	171
	Chr6	6815199	6815405	207
	Chr6	6815490	6815533	44
	Chr6	6815751	6816034	284
	Chr6	6816386	6817095	710
	Chr6	6818621	6818889	269
	Chr6	6819868	6819910	43
	Chr6	6819980	6819983	4
	Chr6	6820104	6820138	35
	Chr6	6820834	6820985	152
	Chr6	6820993	6821010	18
	Chr6	6821213	6821279	67
	Chr6	6824886	6825159	274
	Chr6	6827900	6828063	164
	Chr6	6829122	6829258	137
	Chr6	6830037	6831843	1807
	Chr6	6831924	6831999	76
	Chr6	6832076	6832118	43
	Chr6	6833910	6833953	44
	Chr6	6833991	6834096	106
	Chr6	6838352	6838542	191
	Chr6	6838602	6838721	120
	Chr6	6841094	6841154	61
	Chr6	6841343	6841471	129
	Chr6	6841884	6841898	15
	Chr6	6842990	6843123	134
	Chr6	6843894	6843948	55
	Chr6	6844171	6844645	475
	Chr6	6846093	6846301	209
	Chr6	6848246	6848339	94
	Chr6	6849090	6849243	154
	Chr6	6852469	6852486	18
	Chr6	6853303	6853632	330
	Chr6	6853781	6853973	193
	Chr6	6854432	6854485	54
	Chr6	6855044	6855057	14
	Chr6	6855073	6855097	25
	Chr6	6855555	6855698	144
	Chr6	6856091	6856229	139
	Chr6	6856449	6856486	38
	Chr6	6856514	6856901	388
	Chr6	6856914	6856941	28
	Chr6	6857377	6857394	18
	Chr6	6857429	6857440	12
	Chr6	6857450	6857472	23
	Chr6	6857618	6857730	113
	Chr6	6858037	6858057	21
	Chr6	6858316	6858338	23
	Chr6	6858361	6858374	14
	Chr6	6858547	6858692	146
	Chr6	6859231	6859296	66
	Chr6	6859340	6859369	30
	Chr6	6859390	6859400	11
	Chr6	6859611	6859772	162
	Chr6	6863058	6863561	504
	Chr6	6863816	6863889	74
	Chr6	6864127	6864266	140
	Chr6	6864342	6864422	81
	Chr6	6864459	6864545	87
	Chr6	6864558	6864605	48
	Chr6	6864696	6864696	1
	Chr6	6864741	6864818	78
	Chr6	6869076	6869184	109
	Chr6	6869393	6869506	114
	Chr6	6869637	6869933	297
	Chr6	6870063	6870148	86
	Chr6	6870257	6870265	9
	Chr6	6877762	6877770	9
	Chr6	6877879	6877911	33
	Chr6	6877945	6877981	37
	Chr6	6878168	6878171	4
	Chr6	6879070	6879151	82
	Chr6	6879167	6879186	20
	Chr6	6879598	6879602	5
	Chr6	6879622	6879626	5
	Chr6	6879683	6880061	379
	Chr6	6880498	6880906	409
	Chr6	6881941	6882282	342
	Chr6	6882502	6882621	120
	Chr6	6883118	6883155	38
	Chr6	6883191	6883211	21
	Chr6	6887316	6887464	149
	Chr6	6887954	6888219	266
	Chr6	6888878	6889047	170
	Chr6	6891668	6891707	40
	Chr6	6891838	6892369	532
	Chr6	6893185	6893191	7
	Chr6	6898350	6898505	156
	Chr6	6898739	6898765	27
	Chr6	6900660	6900685	26
	Chr6	6900785	6900997	213
	Chr6	6903020	6903597	578
	Chr6	6908773	6908784	12
	Chr6	6912160	6912271	112
	Chr6	6912368	6912475	108
	Chr6	6913106	6913190	85
	Chr6	6913286	6913299	14
	Chr6	6913359	6913547	189
	Chr6	6920751	6921205	455
	Chr6	6925467	6925548	82
	Chr6	6927897	6928068	172
	Chr6	6928766	6929191	426
	Chr6	6929552	6930023	472
	Chr6	6931096	6931180	85
	Chr6	6931497	6931685	189
	Chr6	6935940	6936091	152
	Chr6	6936102	6936151	50
	Chr6	6936811	6936876	66
	Chr6	6938639	6938732	94
	Chr6	6939383	6939437	55
	Chr6	6939508	6939626	119
	Chr6	6940081	6940419	339
	Chr6	6940519	6940640	122
	Chr6	6940749	6941135	387
	Chr6	6942642	6942823	182
	Chr6	6943750	6943773	24
	Chr6	6944223	6944695	473
	Chr6	6944946	6945131	186
	Chr6	6946566	6946731	166
	Chr6	6946943	6947678	736
	Chr6	6947710	6947820	111
	Chr6	6948111	6948435	325
	Chr6	6952094	6952098	5
	Chr6	6953488	6953724	237
	Chr6	6954972	6955128	157
	Chr6	6955787	6956488	702
	Chr6	6956554	6956573	20
	Chr6	6956876	6956913	38
	Chr6	6957006	6957058	53
	Chr6	6957893	6958616	724
	Chr6	6958797	6959008	212
	Chr6	6959026	6959084	59
	Chr6	6960925	6960926	2
	Chr6	6961011	6961021	11
	Chr6	6961056	6961100	45
	Chr6	6961223	6961239	17
	Chr6	6963179	6964312	1134
	Chr6	6964324	6964335	12
	Chr6	6964357	6964359	3
	Chr6	6967780	6968242	463
	Chr6	6970518	6970542	25
	Chr6	6970652	6970668	17
	Chr6	6975739	6975808	70
	Chr6	6977346	6977353	8
	Chr6	6979138	6979149	12
	Chr6	6979519	6979526	8
	Chr6	6980942	6980983	42
	Chr6	6981143	6981195	53
	Chr6	6981878	6982080	203
	Chr6	6982685	6982976	292
	Chr6	6983307	6983692	386
	Chr6	6985346	6985348	3
	Chr6	6985672	6985776	105
	Chr6	6986818	6986864	47
	Chr6	6987348	6987445	98
	Chr6	6987485	6987517	33
	Chr6	6987600	6987655	56
	Chr6	6987669	6987720	52
	Chr6	6987838	6987986	149
	Chr6	6988217	6988248	32
	Chr6	6991291	6992006	716
	Chr6	6992045	6992303	259
	Chr6	6995011	6995018	8
	Chr6	7001022	7001062	41
	Chr6	7001112	7001196	85
	Chr6	7002089	7002156	68
	Chr6	7002539	7002567	29
	Chr6	7002641	7002668	28
	Chr6	7004807	7004987	181
	Chr6	7005517	7005606	90
	Chr6	7005809	7005843	35
	Chr6	7006612	7006757	146
	Chr6	7007003	7007038	36
	Chr6	7007106	7007319	214
	Chr6	7008737	7008744	8
	Chr6	7008781	7008797	17
	Chr6	7009552	7009608	57
	Chr6	7009754	7009786	33
	Chr6	7009864	7009907	44
	Chr6	7009922	7010047	126
	Chr6	12154744	12155464	721
	Chr6	13906380	13906814	435
	Chr6	16203495	16203560	66
	Chr7	3211501	3211792	292
	Chr7	3239699	3239707	9
	Chr7	3335013	3335061	49
	Chr7	3491019	3491106	88
	Chr7	3574083	3574090	8
	Chr7	3664602	3664607	6
	Chr7	3752317	3752327	11
	Chr7	3786693	3786728	36
	Chr7	3795996	3796055	60
	Chr7	3803677	3803711	35
	Chr7	3803741	3803823	83
	Chr7	3805094	3805247	154
	Chr7	3805860	3808526	2667
	Chr7	3822364	3822400	37
	Chr7	3822423	3822533	111
	Chr7	3828243	3828587	345
	Chr7	3828666	3828688	23
	Chr7	3828739	3828780	42
	Chr7	3828804	3828867	64
	Chr7	3829112	3829246	135
	Chr7	3829687	3829920	234
	Chr7	3833166	3833361	196
	Chr7	3834378	3834426	49
	Chr7	3842108	3842129	22
	Chr7	3842186	3842211	26
	Chr7	3851827	3852058	232
	Chr7	3860308	3860382	75
	Chr7	3862014	3862212	199
	Chr7	3862819	3862903	85
	Chr7	3863119	3863327	209
	Chr7	3866108	3866274	167
	Chr7	3866671	3866686	16
	Chr7	3870951	3871126	176
	Chr7	3871150	3871215	66
	Chr7	3871393	3871406	14
	Chr7	3871483	3871572	90
	Chr7	3871682	3871706	25
	Chr7	3872035	3872556	522
	Chr7	3879469	3883877	4409
	Chr7	3883908	3884166	259
	Chr7	3884280	3884302	23
	Chr7	3884312	3884326	15
	Chr7	3884335	3884420	86
	Chr7	3884427	3884464	38
	Chr7	3884477	3884638	162
	Chr7	3884796	3885641	846
	Chr7	3885681	3885708	28
	Chr7	3885715	3909839	24125
	Chr7	3909924	3910177	254
	Chr7	3910191	3910203	13
	Chr7	3910217	3910250	34
	Chr7	3910471	3910681	211
	Chr7	3910707	3910741	35
	Chr7	3910813	3910880	68
	Chr7	3910958	3911050	93
	Chr7	3911999	3912556	558
	Chr7	3912571	3913019	449
	Chr7	3913983	3915499	1517
	Chr7	3915535	3915655	121
	Chr7	3915704	3915846	143
	Chr7	3915857	3918648	2792
	Chr7	3918664	3919098	435
	Chr7	3919141	3919248	108
	Chr7	3919326	3919679	354
	Chr7	3919993	3920479	487
	Chr7	3920517	3921211	695
	Chr7	3921270	3921276	7
	Chr7	3924128	3928124	3997
	Chr7	3928206	3928341	136
	Chr7	3928352	3928378	27
	Chr7	3928385	3928440	56
	Chr7	3928443	3928667	225
	Chr7	3928691	3928740	50
	Chr7	3928760	3928949	190
	Chr7	3928987	3928999	13
	Chr7	3929011	3932959	3949
	Chr7	3950874	3951008	135
[truncated: 1,188 more rows]
